## RESEARCH ARTICLE

# Impact of staff training on university productivity through job satisfaction: A study of ISO 9001- certified institutions

Shahzaf Iqbal<sup>1\*</sup>, Dr. Mubashir Hanif<sup>2\*</sup>, Dr. Sohaib Khan<sup>3</sup>

**1** School of Technology Management and Logistics, Universiti Utara Malaysia, Sintok, Kedah, Malaysia, **2** Professor Public Health, Health Services Academy, Islamabad, Pakistan, **3** Associate Professor Public Health, Health Services Academy, Islamabad, Pakistan

\* [shahzafiqbal@yahoo.com](mailto:shahzafiqbal@yahoo.com) (SI); [mubashir.hanif@hsa.edu.pk](mailto:mubashir.hanif@hsa.edu.pk) (MH)

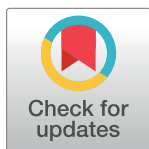

## Abstract

The study examines the influence of staff training on university productivity through the job satisfaction of academic and administrative staff in ISO 9001-certified universities in Pakistan, utilizing a quantitative research approach. Data were gathered through online surveys using purposive sampling from academic and administrative staff, with analysis performed using SmartPLS-4. The results indicate that staff training significantly influences both job satisfaction and university productivity, with job satisfaction serving as a significant mediator. This research contributes to scholarly discourse by validating Organizational Learning Theory in ISO 9001-certified universities, highlighting the enhancement of productivity and job satisfaction through ISO 9001-aligned staff training. It also underscores the influence of QMS on employee attitudes and university productivity, highlighting the significance of ISO 9001 implementation, specifically through staff training, in university operations. Practical implications include recommendations for policymakers, administrators, and quality managers to prioritize ISO 9001-focused training to boost productivity and certification success, foster a culture of continuous learning, and improve educational quality and organizational outcomes. However, limitations such as the study's cross-sectional design, purposive sampling, and focus on specific universities in Pakistan may limit generalizability. Future research should explore novel approaches to understanding factors influencing job satisfaction among academic and administrative staff to enhance productivity in ISO 9001-certified universities worldwide.

## OPEN ACCESS

**Citation:** Iqbal S, Hanif D.M, Khan D.S (2024) Impact of staff training on university productivity through job satisfaction: A study of ISO 9001-certified institutions. *PLoS ONE* 19(7): e0306799. <https://doi.org/10.1371/journal.pone.0306799>

**Editor:** Faisal Shafique Butt, COMSATS University Islamabad - Wah Campus, PAKISTAN

**Received:** May 24, 2024

**Accepted:** June 24, 2024

**Published:** July 9, 2024

**Copyright:** © 2024 Iqbal et al. This is an open access article distributed under the terms of the [Creative Commons Attribution License](https://creativecommons.org/licenses/by/4.0/), which permits unrestricted use, distribution, and reproduction in any medium, provided the original author and source are credited.

**Data Availability Statement:** All relevant data are within the manuscript and its [Supporting Information](#) files.

**Funding:** The author(s) received no specific funding for this work.

**Competing interests:** The authors have declared that no competing interests exist.

## 1. Introduction

Higher Education Institutions (HEIs) have undergone significant evolution from their traditional roles, gaining immense importance in the 21st century due to their diverse impacts on individuals, societies, and economies. Serving as hubs for knowledge, research, innovation, and the cultivation of global citizenship through entrepreneurship and collaboration, they play a pivotal role. Nevertheless, HEIs, particularly those in developing countries like Pakistan, face

substantial challenges primarily due to inadequate funding. This deficiency compromises educational quality, hindering service quality, organizational productivity, and performance [1–4]. Pakistan allocated a mere 2.44% of its GDP to education in 2023 [5], exacerbating financial constraints for universities [6]. Thus, the imperative of efficient resource utilization becomes even more pronounced. Productivity, a critical determinant of organizational success, relies on the judicious allocation of resources, including raw materials, labor, skills, capital, infrastructure, intellectual property, managerial expertise, and financial backing, in the production of goods and services [7, 8].

With limited resources available for HEIs in Pakistan, establishing a robust quality management system (QMS) is crucial to enhance efficiency, reduce waste, and increase productivity. Quality education is pivotal for productivity improvement, equipping individuals with skills and knowledge that enhance efficiency, management effectiveness, product and process quality, technological advancements, regulatory compliance, and employee expertise [9, 10]. The adoption of ISO 9001 certification emerges as a notable framework capable of enhancing the operational efficiency and productivity of Pakistani universities. However, the significant disparity between ISO 9001 certification rates in educational institutions (25) compared to other sectors (2693) in Pakistan indicates a need for further adoption [11]. University leaders' skepticism towards ISO 9001 contrasts with prior findings suggesting its potential to boost productivity through role definition, internal audits, work supervision, and planning facilitation [12]. Neglecting ISO 9001 adoption or implementation has resulted in subpar education quality and organizational inefficiencies, reflected in the scant representation of Pakistani universities in global rankings [13]. Addressing these challenges is crucial for enhancing academic quality, productivity, and university performance.

Investing in human capital through staff training initiatives is a promising strategy for addressing organizational challenges. Previous research emphasizes the significance of staff training in enhancing organizational performance by fostering improved skills, autonomy, job satisfaction, and positive management relationships [14, 15]. Additionally, scholars highlight training's role in improving management systems, product quality, and various organizational factors, including employee retention and service quality [9, 16]. Research in higher education, exemplified by studies on Nigerian public universities [17] and ISO 9001 implementation [18], emphasizes the importance of continuous staff training. However, the relationship between staff training, job satisfaction, and university productivity remains underexplored, particularly in the context of Pakistani higher education.

## 1.1 Research gaps

This study identifies several critical gaps within the higher education context in Pakistan. Firstly, it highlights the issue of underfunding, which compromises educational quality and organizational productivity, exacerbated by Pakistan's low GDP allocation to education. Secondly, it emphasizes the need for efficient resource utilization through the establishment of a robust QMS to enhance productivity. Thirdly, it points out the low adoption rates of ISO 9001 certification among educational institutions compared to other sectors, alongside university leaders' skepticism towards ISO 9001 despite its proven potential to improve productivity. Additionally, the study notes a lack of research on the relationship between staff training, job satisfaction, and university productivity, particularly within the Pakistani context.

## 1.2 Significance and contributions of research

The current study presents significant theoretical and practical contributions. It validates the applicability of Organizational Learning Theory (OLT) in ISO 9001-certified universities,

demonstrating a notable relationship between staff training aligned with ISO 9001 standards, job satisfaction, and university productivity. This research elucidates how ISO 9001 implementation impacts university operations, enhancing our understanding of quality management's influence on productivity. Additionally, it provides insights into adapting these practices across diverse cultures. The study offers guidance for Pakistani universities on effective ISO 9001 implementation and informs human resource strategies by highlighting the benefits of systematic staff training. It emphasizes the importance of continuous learning and improvement within universities, offering administrators strategic initiatives to cultivate a culture of organizational learning. Finally, the findings assist policymakers and university administrators in shaping quality management policies in higher education, emphasizing the benefits of prioritizing staff training aligned with ISO 9001 standards for enhancing productivity, job satisfaction, and educational quality.

### 1.3 Research questions

To address the identified research gaps, the authors have formulated three research questions (RQs). The outcomes will benefit future researchers, along with academic and administrative staff in higher education globally, with a particular focus on Pakistan:

RQ1: What is the impact of staff training on job satisfaction and university productivity in the higher education context?

RQ2: What is the impact of job satisfaction on university productivity in the higher education context?

RQ3: Does job satisfaction mediate the relationship between staff training and university productivity in the higher education context?

The following sections of this article will delve into theoretical foundations, review pertinent literature, outline research methodology, present findings, and discuss implications for theory, practice, and future research, aiming to elucidate how staff training can catalyze the improvement of university productivity through job satisfaction of academic and administrative staff, thus fostering organizational excellence within Pakistan's higher education landscape.

## 2. Literature review

### 2.1 Theoretical framework

The study employs the Organizational Learning Theory (OLT), which posits that organizations evolve, innovate, and enhance performance through knowledge acquisition, dissemination, and utilization over time [19]. The rationale for selecting OLT as the primary theory stems from its recognition of the critical role of staff training in organizational learning. Training serves as a primary mechanism for improving collective knowledge, skills, and competencies by facilitating knowledge acquisition, distribution, interpretation, and retention within the organization. Investing in training programs enhances individual employee capabilities and cultivates an adaptable and innovative workforce, thereby boosting overall performance and productivity.

OLT provides a comprehensive framework for evaluating university productivity by examining the impact of staff training (as an organizational learning process) on job satisfaction. This study aims to explore how universities enhance productivity through continuous learning initiatives such as training of academic and administrative staff and their job satisfaction. OLT emphasizes the significance of organizational structures, culture, and leadership in shaping

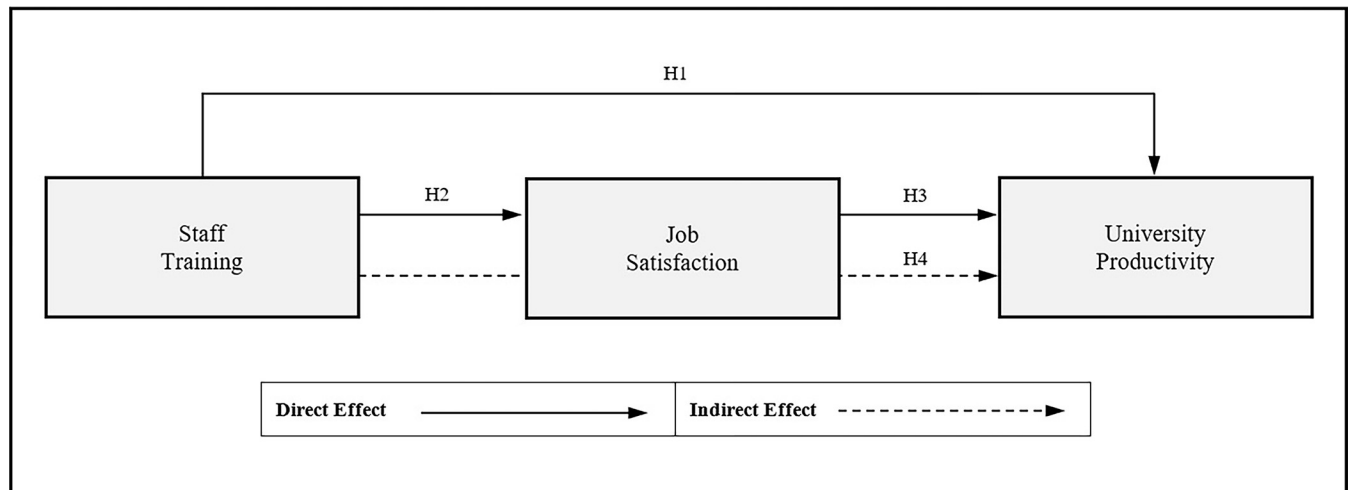

**Fig 1. Theoretical framework.**

<https://doi.org/10.1371/journal.pone.0306799.g001>

learning processes, warranting an investigation into how staff training programs foster a culture of learning and promote knowledge acquisition, particularly in ISO 9001-certified universities.

Furthermore, OLT explores the enduring effects of learning on organizational performance and strategic capabilities, investigating how staff training initiatives strengthen organizational capacities, drive innovation, and enhance productivity over time. Given OLT's alignment with quality management principles, it is relevant to explore the relationships among staff training, job satisfaction, and productivity within ISO 9001-certified universities. The theoretical framework adopts the principle of parsimony, emphasizing simplicity in explaining phenomena and proposing solutions, which is preferable to overly complex research frameworks that incorporate numerous factors [20]. This approach ensures clarity and precision in addressing the research questions. Fig 1 illustrates the theoretical framework, with staff training as the independent variable, job satisfaction as the mediator, and university productivity as the dependent variable.

## 2.2 University productivity

In today's volatile economic landscape, organizational success is intricately linked to productivity [21], which is imperative for the survival of any company [22]. Before exploring productivity, it is essential to comprehend the concepts of effectiveness and efficiency, which constitute its foundation and are influenced by various factors [23]. Effectiveness entails meeting customer needs and expectations efficiently, while efficiency focuses on minimizing resource waste to achieve effectiveness [24]. These factors encompass management systems, product and process quality, technological advancements, and employee knowledge and skills [9]. While productivity and efficiency are often conflated, productivity involves effective resource utilization, whereas efficiency is gauged by performance [23]. Productivity serves as a pivotal metric for organizational success, signifying profitability and guiding employee recognition [8]. Furthermore, it propels economic growth, fosters innovation, and reduces waste [7].

In higher education, productivity entails efficiently allocating resources to achieve educational goals through effective teaching methods, optimized class time, high-quality publications, technological leverage for administrative efficiency, and ensuring student success via

learning outcomes, graduation rates, and support services. Education is believed to enhance productivity by equipping individuals with skills and knowledge that amplify efficiency [10]. However, measuring productivity in academia is complex due to diverse activities such as teaching, research, administration, student achievement, resource management, and community engagement. Researchers have proposed methods for productivity improvement, such as increasing output, reducing input, or maintaining output levels with reduced input. Various factors influencing productivity encompass management effectiveness, product and process quality, technological advancements, regulatory influences, and employee knowledge and skills [9]. Nevertheless, productivity in education should align with institutional missions, particularly concerning graduates' employability and career success [10].

### 2.3 Staff training and university productivity

Training academic and administrative staff on ISO 9001 requirements is essential for enhancing quality and improving university productivity, especially in regions like Pakistan where financial constraints are prevalent. Research indicates that trained employees demonstrate improved skills, autonomy, and job satisfaction, thereby fostering positive relationships with management [15]. Implementing ISO 9001 standards in universities requires comprehensive staff training to ensure compliance and efficient execution of QMS. While prior research has examined staff training's impact on employee productivity in higher education settings, literature gaps persist regarding ISO 9001-related training within universities. For instance, it has been argued that the effectiveness of staff development programs in Nigerian public universities but did not address ISO 9001 training [17]. Similarly, another study surveyed faculty members in Kurdistan to assess the effects of staff training on productivity in teaching and administrative roles [25]. However, their findings lack generalizability due to limitations such as a small sample size and inadequate information on ISO 9001 certification among participating universities. Additionally, researchers examined the influence of staff training on librarians' job performance, highlighting its positive impact on training initiatives [26]. Nonetheless, further investigation is required to grasp the complete influence of ISO 9001-related staff training on university productivity, encompassing insights from both faculty and quality managers. As a result, the following hypothesis is put forward:

**H1:** Staff training is significantly related to university productivity.

### 2.4 Staff training and job satisfaction

To enhance job satisfaction among employees in ISO 9001-certified universities, comprehensive training of faculty and administrative staff on QMS requirements is imperative. Such training is essential for ensuring compliance and effective QMS. By investing in training programs that empower employees, promote continuous improvement, and support professional development, universities can cultivate a proficient and motivated workforce. Numerous studies have highlighted the positive impact of training on job satisfaction. For instance, employee training contributes to both growth and satisfaction, as argued [16], while trained employees demonstrate enhanced skills and job satisfaction, fostering positive relationships with management [15]. Additionally, research conducted in Gauteng, South Africa, within the hospitality industry's golf club sector, emphasized the significant influence of training on employee retention, development, and service quality [16]. Similarly, a study at Federal Polytechnic, Nasarawa, Nigeria, revealed that training significantly improved staff timeliness and work quality [27]. Moreover, supervisor support was found to significantly impact the job satisfaction of teachers in public high schools in Giresun province, Turkey [28]. Nevertheless, limited

evidence exists regarding the link between staff training and job satisfaction in ISO 9001-certified Pakistani universities, necessitating further research. As a result, the following hypothesis is suggested:

**H2:** Staff training is significantly related to job satisfaction.

## 2.5 Job satisfaction and university productivity

Job satisfaction, a contemporary concept, contrasts historical practices where jobs were often inherited [29]. It is defined as the assessment of employee happiness at work [30], holding significance across various organizational settings, including higher education. Job satisfaction in higher education, encompassing fulfillment with various work aspects, is crucial for staff motivation, productivity, retention, and overall well-being, thereby influencing the quality of education and services. Factors shaping job satisfaction among academic staff include salary, job characteristics, work environment, conditions, and leadership dynamics [29]. While limited evidence previously existed regarding job satisfaction's impact on university productivity, recent studies reveal its significant effects on employee performance [31] and work performance [32]. Similarly, a study among educators in public high schools across Turkey highlights the considerable influence of job satisfaction on job performance [28]. However, the narrow focus of these studies limits their generalizability, necessitating further empirical investigation within the higher education sector. Scholars have synthesized theories on job satisfaction within Pakistan's higher education landscape, emphasizing its dynamic nature shaped by cultural factors. They argue that academic staff's job satisfaction correlates with delivering quality education, enhancing student satisfaction, and improving university performance [30]. Nevertheless, the descriptive nature of this study and its reliance on a literature review pose limitations to its scope. Given the discussion and scant evidence on job satisfaction's effect on university productivity in Pakistan, additional studies are imperative. Consequently, the following hypothesis is posited:

**H3:** Job satisfaction is significantly related to university productivity.

## 2.6 Job satisfaction as a mediator

Previous literature extensively explores job satisfaction, investigating its predictive value and its role as a mediator in various organizational contexts. It significantly influences organizational commitment [33], employee performance [31], and overall work performance [32]. Furthermore, job satisfaction serves as a mediator across various contexts. For example, it mediates between supervisor support and job performance [28], as well as among factors such as continuous learning, strategic leadership, and organizational commitment [33]. Additionally, it plays a mediating role between different leadership styles (e.g., transformational and transactional) and academic staff performance [34], and between organizational justice and citizenship behavior [35]. Nevertheless, a recent study conducted in State Polytechnic colleges in Indonesia presented divergent outcomes: although job satisfaction was found to significantly mediate the correlation between work environment and employee performance, it did not demonstrate such mediation concerning compensation and employee performance [36]. This discrepancy underscores the variability in the mediating role of job satisfaction and prompts a call for additional evidence, particularly within ISO 9001-certified universities in Pakistan. Thus, the following hypothesis is posited:

**H4:** Job satisfaction mediates the relationship between staff training and university productivity.



### 3. Methodology

#### 3.1 Sample and data collection

The target population of this study comprised ISO 9001 certified universities in Pakistan. According to the latest ISO survey, only 25 institutions in Pakistan held ISO 9001 certification [11]. The unit of analysis was the institution, while the units of observation were academic and administrative staff. Purposive sampling was selected due to the absence of a sampling frame listing all 25 ISO 9001-certified institutions in Pakistan. This method was deemed appropriate as it allows for the selection of participants likely to provide relevant information [20]. Seven universities were identified through website searches as a result, employing a judgmental purposive sampling technique. Similar approaches have been used in prior studies under comparable conditions [37], justified by participants' expertise in quality management within the education sector [38]. To mitigate potential biases inherent in non-probability sampling, criteria were established based on participant's willingness to engage, familiarity with the subject matter, and extensive experience with ISO 9001 requirements through their universities' implementation and maintenance of the standard. The recruitment spanned three months, from October 5, 2023, to December 31, 2023. A total of 200 online questionnaires were distributed to participants from the selected universities. All participants provided informed consent, guaranteeing confidentiality and non-disclosure of identifying information. From the distributed questionnaires, 135 responses were received. Thirteen responses were excluded due to consistent response patterns, resulting in 121 valid responses and a response rate of 60.5%. To confirm the adequacy and representativeness of the sample size, G\*Power software was employed, based on two predictors, a statistical power of 0.95, a significance level of 0.05, and a moderate effect size of 0.15 [39–41]. The calculation indicated a minimum sample size requirement of 107. With an actual sample size of 121, our study surpasses this requirement, ensuring robust statistical power for analysis.

#### 3.2 Measures

The current investigation employed an online questionnaire designed on a 5-point Likert scale, comprising 33 items divided into two sections. The initial segment addressed demographic information through seven questions, while the subsequent section consisted of 26 questions adapted from established literature to ensure content validity. Among these, 15 items focused on staff training [42], exemplified by a sample statement: "Training on ISO 9001 standard requirements emphasizes decreasing informal interactions in situations where formality is advantageous". Additionally, five items addressed job satisfaction [43–45], represented by the statement, "I find my work to be very satisfying". Furthermore, six items assessed university productivity [46–48], with a sample statement indicating, "Our university uses its technological resources efficiently". This study obtained approval from the Ethics Committee of the Health Services Academy, Islamabad, Government of Pakistan (Ref. F. No. 20-10/2023-omi/HSA-007) on October 2, 2023. All participants, including academic and administrative staff, provided written informed consent, which assured confidentiality, data security, and non-disclosure of private information prior to completing the survey questionnaire. Moreover, an ethics statement presented at the beginning of the questionnaire underscored the voluntary nature of participation, with participants guaranteed data confidentiality. Before commencing the main study, a pre-test was administered to a panel of six experts comprising two senior professors, three quality directors, and one quality practitioner. Their profound expertise in pertinent domains yielded invaluable feedback for enhancing the questionnaire.

## 4. Data analysis and results

### 4.1 Demographic characteristics

Out of 121 respondents, 71.9% were from public sector universities, while 28.1% were from private sector universities. Geographically, 43% were from Islamabad, 28.1% from Karachi, and 14.9% each from Jamshoro and Lahore. Male respondents constituted 52.1%, with 47.9% being female. The majority fell within the 41–50 age bracket (50.4%), followed by 31–40 (46.3%). Predominant qualifications were Ph.D. (52.9%) and MSc (38%). Professional designations included assistant professors (32.2%), lecturers (25.6%), and associate professors (24%). Engineering accounted for the highest departmental representation at 35.5%, followed by social sciences (18.2%), computer sciences (17.4%), management sciences (16.5%), and Quality Enhancement Cell (QEC) (12.4%) (see [Table 1](#)).

### 4.2 Descriptive statistics

The descriptive statistics in [Table 2](#) present mean (M) and standard deviation (SD) values for all three variables: staff training (M = 3.59, SD = 0.58), job satisfaction (M = 3.38, SD = 0.48), and university productivity (M = 3.59, SD = 0.66). The results indicate that staff training and university productivity share the same mean score, but the standard deviation of university productivity is slightly higher than that of staff training. Job satisfaction has the lowest mean score but also the smallest standard deviation. Overall, standard deviation values for all variables range from 0.48 to 0.66, suggesting a closely clustered distribution around the mean.

### 4.3 Multicollinearity and common-method bias (CMB)

Before hypothesis testing, the data underwent analysis using SmartPLS-4 software to detect potential multicollinearity and common-method bias (CMB). Results showed that all “Variance Inflation Factor” (VIF) values for each construct/variable were below 5 [49], indicating no multicollinearity. Additionally, barring one exception, all VIF values remained below the recommended threshold of 3.3 [50], providing further validation of the absence of both CMB and multicollinearity.

### 4.4 Measurement model

The initial phase of PLS-SEM analysis involves assessing the measurement model, scrutinizing factor loadings, reliability, convergent validity, and discriminant validity of the constructs, as illustrated in [Fig 2](#). The factor loadings of all items were examined, with most exceeding 0.600, except for two items (UPR4 and UPR5) which fell below this threshold. However, these items were retained as their exclusion did not significantly impact the average variance extracted (AVE) value of the corresponding construct [51]. Subsequent analysis indicated that Cronbach’s alpha, composite reliability (CR), and AVE values for all constructs surpassed the recommended thresholds, with values of  $\alpha > 0.700$ ,  $CR > 0.700$ , and  $AVE > 0.500$  [51]. Further details can be found in [Table 3](#).

Moreover, discriminant validity for all constructs was assessed via the Heterotrait-Monotrait (HTMT) method. Findings ([Table 4](#)) indicate that all HTMT ratios remained below the recommended threshold of 0.85 [52], confirming discriminant validity for all variables.

### 4.5 Structural model

The structural model (see [Fig 3](#)), constituting the second stage of PLS-SEM analysis, was evaluated to test four hypotheses (see [Table 5](#)). Three direct effect hypotheses (H1–H3) were proposed and all were significant: H1:  $ST \rightarrow UPR$  ( $\beta = 0.653$ ,  $t = 13.386$ ,  $p = 0.000$ ), H2:  $ST \rightarrow JS$  ( $\beta = 0.246$ ,  $t = 3.102$ ,  $p = 0.001$ ), and H3:  $JS \rightarrow UPR$  ( $\beta = 0.205$ ,  $t = 3.418$ ,  $p = 0.000$ ), supporting



**Table 1. Respondents profile.**

| Items               | N  | %    |
|---------------------|----|------|
| Sector              |    |      |
| Public Sector       | 87 | 71.9 |
| Private Sector      | 34 | 28.1 |
| City                |    |      |
| Islamabad           | 52 | 43.0 |
| Karachi             | 34 | 28.1 |
| Jamshoro            | 18 | 14.9 |
| Lahore              | 17 | 14.0 |
| Gender              |    |      |
| Male                | 63 | 52.1 |
| Female              | 58 | 47.9 |
| Designation         |    |      |
| Professor           | 7  | 5.8  |
| Associate Professor | 29 | 24.0 |
| Assistant Professor | 39 | 32.2 |
| Lecturer            | 31 | 25.6 |
| Director            | 7  | 5.8  |
| Deputy Director     | 4  | 3.3  |
| Assistant Director  | 4  | 3.3  |
| Age                 |    |      |
| 30 or less          | 3  | 2.5  |
| 31–40               | 56 | 46.3 |
| 41–50               | 61 | 50.4 |
| 51–60               | 1  | 0.8  |
| Qualification       |    |      |
| BS/Master           | 3  | 2.5  |
| MS/M.Phil           | 46 | 38.0 |
| PhD.                | 64 | 52.9 |
| Post. Doc.          | 8  | 6.6  |
| Department          |    |      |
| Social Sciences     | 22 | 18.2 |
| Management Sciences | 20 | 16.5 |
| Computer Sciences   | 21 | 17.4 |
| Engineering         | 43 | 35.5 |
| QEC                 | 15 | 12.4 |

Source: Authors' own findings.

<https://doi.org/10.1371/journal.pone.0306799.t001>

**Table 2. Descriptive statistics.**

|                         | N   | Minimum | Maximum | Mean   | Std. Deviation |
|-------------------------|-----|---------|---------|--------|----------------|
| Staff Training          | 121 | 2.07    | 4.87    | 3.5917 | 0.58313        |
| Job Satisfaction        | 121 | 2.20    | 4.40    | 3.3802 | 0.48125        |
| University Productivity | 121 | 1.83    | 5.00    | 3.5909 | 0.65687        |

Source: Authors' own findings.

<https://doi.org/10.1371/journal.pone.0306799.t002>

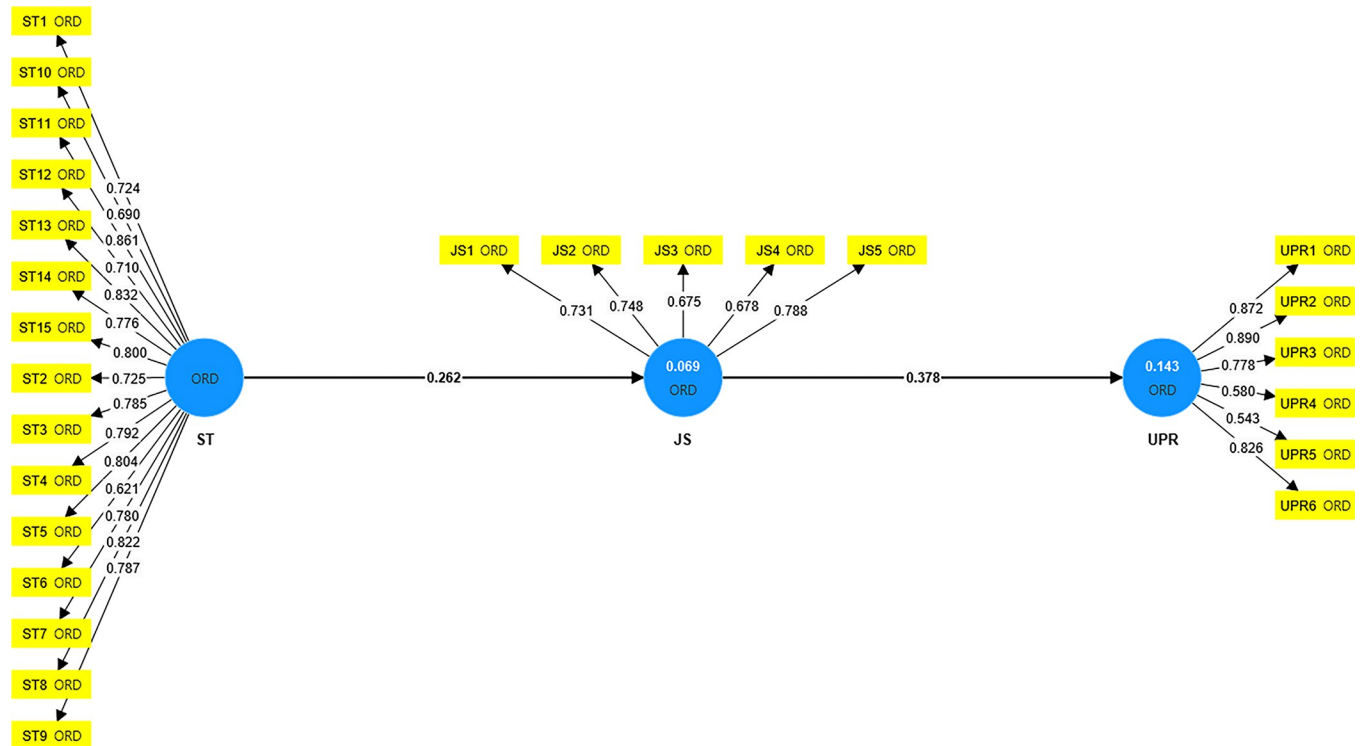

**Fig 2. Measurement model.**

<https://doi.org/10.1371/journal.pone.0306799.g002>

H1, H2, and H3. Additionally, one hypothesis concerning indirect effects (mediation analysis) was proposed, indicating a significant mediating effect of job satisfaction: H4: ST→JS→UPR ( $\beta = 0.050$ ,  $t = 1.987$ ,  $p = 0.023$ ), thereby supporting H4.

## 5. Discussion and conclusion

### 5.1 Discussion on results

This study delves into how staff training on ISO 9001 requirements enhances job satisfaction among academic and administrative staff, ultimately leading to increased university productivity through continuous learning initiatives and knowledge management practices. Drawing upon the OLT, which suggests that organizations improve performance by acquiring, disseminating, and utilizing knowledge over time [19], the study aims to demonstrate the relevance of OLT theory in higher education in Pakistan. It provides a comprehensive framework for evaluating university productivity through organizational learning processes. From an OLT perspective, the study examines how staff training initiatives impact organizational capacities, focusing on the satisfaction of academic and administrative staff, and overall university productivity. OLT's compatibility with quality management principles facilitates the exploration of the interplay between staff training, job satisfaction, and productivity within ISO 9001-certified universities in Pakistan.

The present study aimed to address three research questions within the higher education context of ISO 9001-certified universities in Pakistan. Firstly, it aimed to investigate the influence of staff training on both job satisfaction and university productivity. Secondly, it sought to explore the impact of job satisfaction on university productivity. Lastly, it aimed to examine the mediating role of job satisfaction in the relationship between staff training and university

**Table 3. Reliability and convergent validity.**

| Constructs                    | Item | Loading | Alpha | rho_A | CR    | AVE   |
|-------------------------------|------|---------|-------|-------|-------|-------|
| Staff Training (ST)           | ST1  | 0.724   | 0.773 | 0.777 | 0.847 | 0.526 |
|                               | ST2  | 0.725   |       |       |       |       |
|                               | ST3  | 0.785   |       |       |       |       |
|                               | ST4  | 0.792   |       |       |       |       |
|                               | ST5  | 0.804   |       |       |       |       |
|                               | ST6  | 0.621   |       |       |       |       |
|                               | ST7  | 0.780   |       |       |       |       |
|                               | ST8  | 0.822   |       |       |       |       |
|                               | ST9  | 0.787   |       |       |       |       |
|                               | ST10 | 0.690   |       |       |       |       |
|                               | ST11 | 0.861   |       |       |       |       |
|                               | ST12 | 0.710   |       |       |       |       |
|                               | ST13 | 0.832   |       |       |       |       |
|                               | ST14 | 0.776   |       |       |       |       |
|                               | ST15 | 0.800   |       |       |       |       |
| Job Satisfaction (JS)         | JS1  | 0.731   | 0.951 | 0.967 | 0.956 | 0.592 |
|                               | JS2  | 0.748   |       |       |       |       |
|                               | JS3  | 0.675   |       |       |       |       |
|                               | JS4  | 0.678   |       |       |       |       |
|                               | JS5  | 0.788   |       |       |       |       |
| University Productivity (UPR) | UPR1 | 0.872   | 0.857 | 0.902 | 0.888 | 0.578 |
|                               | UPR2 | 0.890   |       |       |       |       |
|                               | UPR3 | 0.778   |       |       |       |       |
|                               | UPR4 | 0.580   |       |       |       |       |
|                               | UPR5 | 0.543   |       |       |       |       |
|                               | UPR6 | 0.826   |       |       |       |       |

Note: AVE, average variance extracted; CR, composite reliability. Source: Authors’ own findings.

<https://doi.org/10.1371/journal.pone.0306799.t003>

productivity. To achieve these objectives, this study tested four hypotheses (H1-H4). Among these, the first three hypotheses concerned direct relationships involving staff training, job satisfaction, and university productivity. The first hypothesis focused on the direct effects of staff training on university productivity and was found to be significant. This finding is supported by previous studies that have demonstrated the strong impact of staff training on academic staff productivity [17, 25], and librarians’ job performance [26].

The second hypothesis identified a significant impact of staff training on the job satisfaction of academic and administrative staff, consistent with prior research [16, 27, 28]. Similarly, the third hypothesis revealed a positive association between job satisfaction and university

**Table 4. Discriminant validity—HTMT ratio.**

|                               | JS    | ST    | UPR |
|-------------------------------|-------|-------|-----|
| Job Satisfaction (JS)         |       |       |     |
| Staff Training (ST)           | 0.279 |       |     |
| University Productivity (UPR) | 0.425 | 0.748 |     |

Source: Authors’ own findings.

<https://doi.org/10.1371/journal.pone.0306799.t004>

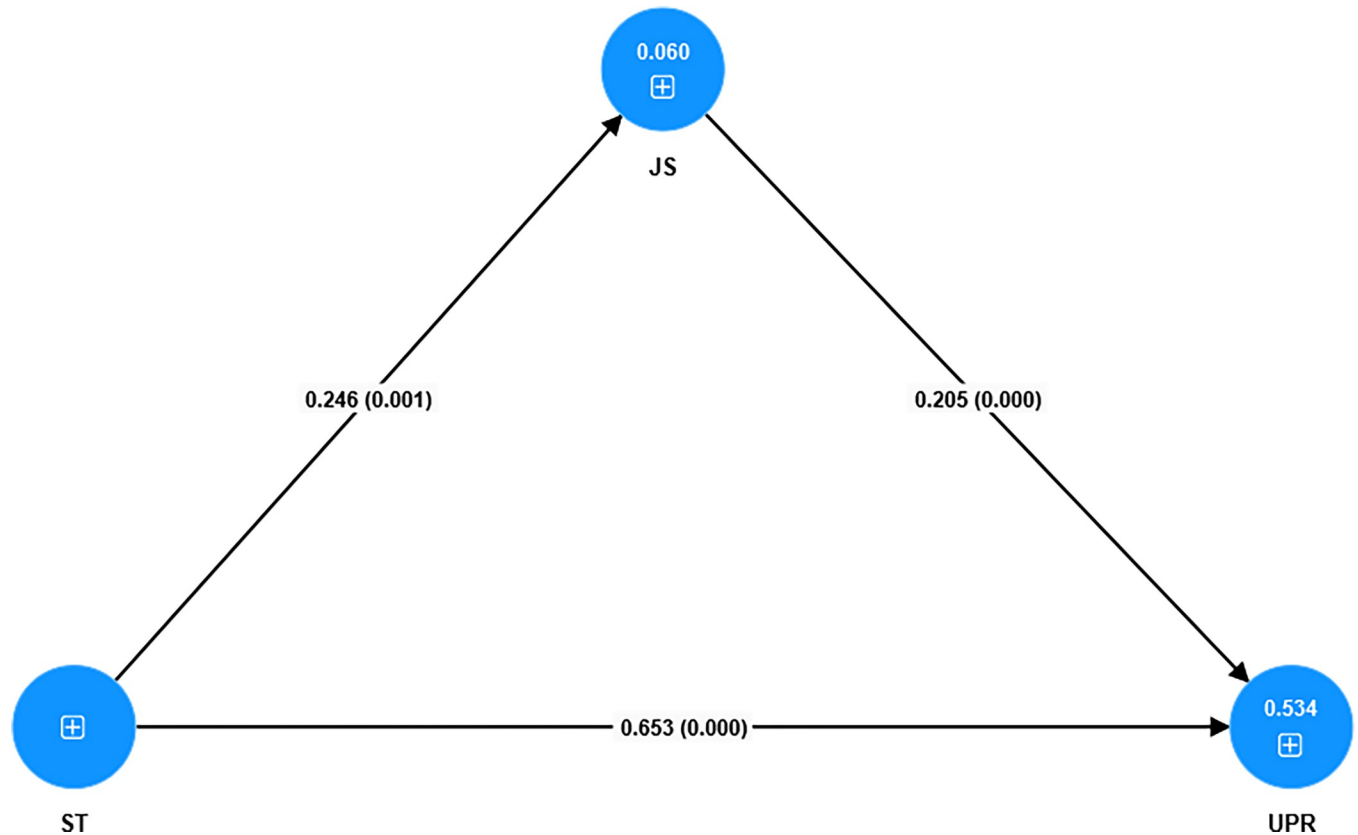

Fig 3. Structural model.

<https://doi.org/10.1371/journal.pone.0306799.g003>

productivity, consistent with previous studies [28, 30–32]. The fourth hypothesis tested the mediation analysis of job satisfaction on staff training and university productivity, with results confirming its significance, supported by prior studies [28, 33–35].

### 5.2 Conclusion

This study examines the impact of training academic and administrative staff on their job satisfaction and university productivity, with a focus on ISO 9001-certified universities in Pakistan. Additionally, it explores how job satisfaction mediates the relationship between staff training and university productivity. The findings confirm the significance of these relationships. Using OLT, the study provides a comprehensive framework for evaluating university productivity through organizational learning processes. Specifically, it investigates how staff

Table 5. Hypotheses testing results.

|    | Relationship    | $\beta$ | SD    | t-value | p-value | Decision  |
|----|-----------------|---------|-------|---------|---------|-----------|
| H1 | ST -> UPR       | 0.653   | 0.049 | 13.386  | 0.000   | Supported |
| H2 | ST -> JS        | 0.246   | 0.079 | 3.102   | 0.001   | Supported |
| H3 | JS -> UPR       | 0.205   | 0.060 | 3.418   | 0.000   | Supported |
| H4 | ST -> JS -> UPR | 0.050   | 0.025 | 1.987   | 0.023   | Supported |

Source: Authors' own findings.

<https://doi.org/10.1371/journal.pone.0306799.t005>

training initiatives affect organizational capacities, particularly the satisfaction of academic and administrative staff, and overall university productivity in ISO 9001-certified universities in Pakistan. The results underscore the pivotal role of training for academic and administrative staff in bolstering motivation and satisfaction, thus fostering increased productivity at both individual and institutional levels. This study enriches theoretical insights and practical implications by amalgamating the human capital perspective with ISO 9001 QMS in the higher education context.

## 6. Implications, limitations, and future directions

### 6.1 Theoretical implications

The present study contributes significantly to theoretical understanding by demonstrating the applicability of OLT within Pakistan's higher education context, yielding several implications. Firstly, it validates the suitability of OLT within the context of ISO 9001-certified universities, affirming that organizations, including universities, can enhance productivity and job satisfaction through systematic staff training aligned with ISO 9001 requirements. Secondly, the study establishes a significant relationship between staff training on ISO 9001 requirements and job satisfaction, thereby augmenting the literature on QMS and their impact on employee attitudes and behaviors, consequently enhancing university productivity. Thirdly, the study illuminates the influence of ISO 9001 implementation, particularly through staff training, on various facets of university operations, thus enriching our understanding of the mechanisms by which quality management practices influence organizational outcomes. Finally, conducted within the specific context of Pakistani universities, the study offers insights into the application and adaptation of quality management practices, guided by international standards such as ISO 9001, across diverse cultural and organizational settings.

### 6.2 Practical implication

The study provides practical implications for various stakeholders. Firstly, it offers guidance for universities in Pakistan and similar contexts on effectively implementing ISO 9001 standards. Prioritizing staff training aligned with ISO 9001 requirements can enhance productivity and job satisfaction, facilitating successful certification and ongoing compliance. Secondly, organizations can use the study results to inform their human resource development strategies, as investing in staff training programs not only improves organizational performance but also boosts employee job satisfaction and retention. Thirdly, the study underscores the significance of continuous learning and improvement within universities. Administrators can devise strategic initiatives aimed at fostering a culture of organizational learning, where staff training acts as a catalyst for productivity enhancement and employee satisfaction. Finally, stakeholders such as policymakers and university administrators can leverage the study's findings to shape policy formulation and decision-making processes concerning quality management practices in higher education. By prioritizing investments in staff training aligned with ISO 9001 standards, they can drive positive organizational outcomes and enhance the overall quality of education delivery.

### 6.3 Limitations and future directions

While providing valuable insights, the study is constrained by certain limitations. Notably, the absence of a sampling frame necessitated the utilization of a purposive sampling technique, thereby restricting participation to academic and administrative staff exclusively from seven ISO 9001-certified universities in Pakistan. Future research endeavors should prioritize

broader stakeholder inclusion and explore the feasibility of employing random sampling techniques. Additionally, researchers should explore innovative approaches to better understand the factors influencing job satisfaction among academic and administrative staff, aiming to enhance productivity globally in ISO 9001-certified universities.

## Supporting information

### S1 File. Survey data.

(XLSX)

### S2 File.

(DOCX)

## Author Contributions

**Conceptualization:** Shahzaf Iqbal.

**Data curation:** Dr. Mubashir Hanif, Dr. Sohaib Khan.

**Formal analysis:** Shahzaf Iqbal.

**Funding acquisition:** Dr. Mubashir Hanif.

**Investigation:** Dr. Sohaib Khan.

**Methodology:** Shahzaf Iqbal.

**Project administration:** Dr. Sohaib Khan.

**Resources:** Dr. Mubashir Hanif, Dr. Sohaib Khan.

**Software:** Shahzaf Iqbal.

**Supervision:** Dr. Mubashir Hanif, Dr. Sohaib Khan.

**Validation:** Dr. Sohaib Khan.

**Writing – original draft:** Shahzaf Iqbal.

**Writing – review & editing:** Dr. Mubashir Hanif, Dr. Sohaib Khan.

## References

1. Iqbal S, Taib CAB, Razalli MR. The effect of accreditation on higher education performance through quality culture mediation: the perceptions of administrative and quality managers. *TQM Journal*. 2024; 36(2):572–92.
2. Iqbal S, Taib CAB, Razalli MR. Examining the Effect of Accreditation on Higher Education Performance through Motivation as a Mediator. *Participatory Educational Research*. 2023; 10(3):89–105.
3. Iqbal S, Razalli MR, Taib CAB. Influence of intrinsic and extrinsic motivation on higher education performance: mediating effect of quality culture. *Frontiers in Education*. 2023; 8:1099415:1–16.
4. Iqbal S, Ashfaq T, Taib CAB, Razalli MR. The effect of quality culture on service quality of public and private Universities: A comparative analysis. *PLOS ONE [Internet]*. 2023; 18(4):1–19. Available from: <https://doi.org/10.1371/journal.pone.0283679> PMID: 37053303
5. Statista. Education—Pakistan [Internet]. Statista Market Forecast. 2023 [cited 2023 Dec 13]. Available from: <https://www.statista.com/outlook/co/socioeconomic-indicators/education/pakistan>
6. Iqbal S, Taib CAB, Razalli MR. The nexus between leadership styles and organizational performance: the mediating role of quality culture. *Quality Assurance in Education*. 2023; 31(4):600–15.
7. Ogochukwu OE, Amah, Edwinah, Okocha, Friday B. Management by Objective and Organizational Productivity: A Literature Review. *South Asian Research Journal of Business and Management*. 2022; 4(3):99–113.



8. Hanaysha JR, Majid M. Employee Motivation and its Role in Improving the Productivity and Organizational Commitment at Higher Education Institutions. *Journal of Entrepreneurship and Business*. 2018; 6(1):17–28.
9. Yadav P, Marwah S. The concept of productivity. *International Journal of Engineering and Technical Research* [Internet]. 2015; 3(5):192–6. Available from: [www.erppublication.org](http://www.erppublication.org)
10. Menon M. Productivity as an indication of quality in higher education: the views of employed graduates in Greece. *Quality in Higher Education* [Internet]. 2016; 22(3):183–96. Available from: <http://dx.doi.org/10.1080/13538322.2016.1249120>
11. ISO Survey. ISO Survey 2022 results—Number of sectors by country for each standard [Internet]. Available Online. 2022. Available from: <https://www.iso.org/committee/54998.html?t=KomURwikWDLiuB1P1c7SjLMLEAgXOA7emZHKGWyn8f3KQUTU3m287NxnPA3Dluxm&view=documents#section-isodocuments-top>
12. Fernández-Cruz FJ, Rodríguez-Mantilla JM, Fernández-Díaz MJ. Assessing the impact of ISO: 9001 implementation on school teaching and learning processes. *Quality Assurance in Education*. 2019; 27(3):285–303.
13. QS. QS World University Rankings 2024: Pakistan [Internet]. QS Quacquarelli Symonds Limited. 2024 [cited 2024 Jan 11]. Available from: <https://www.topuniversities.com/university-rankings/world-university-rankings/2024?region=Asia&countries=pk>
14. Doto, Rimawan E. Impact analysis of ISO 9001 certification on service companies in Indonesia using PLS-SEM. *International Journal of Mechanical and Production Engineering Research and Development*. 2019; 9(2):339–48.
15. Iqbal S, Moosa K, Taib CAB. Optimizing quality enhancement cells in higher education institutions: analyzing management support, quality infrastructure and staff training. *International Journal of Quality and Reliability Management*. 2024; 41(6):1572–93.
16. Joao EAS, Spowart J, Taylor A. Employee training contributes to service quality and therefore sustainability. *African Journal of Hospitality, Tourism and Leisure* [Internet]. 2019; 8(2):1–15. Available from: <https://hdl.handle.net/10210/294075>
17. Okai ON. Impact of Training on Academic Staff Productivity in Public Universities in Rivers State. *International Journal on Integrated Education*. 2020; 3(XII):513–8.
18. Moturi C, Mbithi PMFMF. ISO 9001: 2008 implementation and impact on the University of Nairobi: a case study. *The TQM Journal*. 2015; 27(6):752–60.
19. Argyris C, Schön DA. *Organizational Learning Theory: A Theory of Action Perspective*. Reading, Massachusetts: Addison-Wesley Publishing Company, Inc.; 1978. 1–344 p.
20. Sekaran U, Bougie R. *Research Methods for Business: A Skill-Building Approach*. Seventh. Chichester, West Sussex, United Kingdom: John Wiley & Sons Ltd.; 2016. 420 p.
21. Green P. The perceived influence on organizational productivity: A perspective of a public entity. *Problems and Perspectives in Management*. 2016; 14(2):339–47.
22. Barinua V, Christopher A. Employee Participation and Organizational Productivity. *International Journal of Advanced Academic Research* [Internet]. 2022; 8(4):177–89. Available from: <https://www.ijaar.org/articles/v8n4/sms/ijaar-v8n4-Apr22-p8415.pdf>
23. Torabi F, El-Den J. The impact of Knowledge Management on Organizational Productivity: A Case Study on Koosar Bank of Iran. *Procedia Computer Science* [Internet]. 2017; 124:300–10. Available from: <https://doi.org/10.1016/j.procs.2017.12.159>
24. Harrington HJ. *Business Process Improvement: The Breakthrough Strategy for Total Quality, Productivity, and Competitiveness*. 1st ed. New York: McGraw-Hill, Inc.; 1991.
25. Khan S, Abdullah NN. The impact of staff training and development on teachers' productivity. *Economics, Management and Sustainability*. 2019; 4(1):37–45.
26. Anyaegbu MI, Wali NB. Influence of Staff Training and Development on Librarians Job Performance in Selected University Libraries in South-South, Nigeria. *Library Research Journal* [Internet]. 2021; 4(1):38–60. Available from: <https://journals.unizik.edu.ng/index.php/lrj/article/view/549>
27. Ogbu J., Ojo RG, Ozah PJ. Effects of Training on Academic Staff Performance: A study of Federal Polytechnic Nasarawa. *Bingham Journal of Economics and Allied Studies* [Internet]. 2018; 1(2):1–10. Available from: <https://journal.binghamuni.edu.ng/pdfs/bjeas/2011.pdf>
28. Uzun T, Özdem G. The mediating role of job satisfaction on the relationship between teachers perceptions of supervisor support and job performances. *International Journal of Educational Administration and Policy Studies*. 2017; 9(7):84–90.
29. Islam R, Hossain MM. Job Satisfaction of Academic Staff; An Empirical Research Study on Selected Private Educational Institute at Dhaka City Corporation. *Global Journal of Management and Business*

- Research: A Administration and Management [Internet]. 2018; 18(3):9–15. Available from: <https://journalofbusiness.org/index.php/GJMBR/article/view/2449>
30. Khan AJ, Bhatti MA, Hussain A, Ahmad R, Iqbal J. Employee Job Satisfaction in Higher Educational Institutes: A Review of Theories. *Journal of South Asian Studies*. 2021; 9(3):257–66.
  31. Sunarsih N, Helmiatin. Influence of organizational structure and job satisfaction on employee performance. *Review of Integrative Business and Economics Research* [Internet]. 2017; 6(1):262–76. Available from: <http://buscompress.com/journal-home.htm>
  32. Eliyana A, Ma'arif S, Muzakki. Job satisfaction and organizational commitment effect in the transformational leadership towards employee performance. *European Research on Management and Business Economics* [Internet]. 2019; 25(3):144–50. Available from: <https://doi.org/10.1016/j.iedeen.2019.05.001>
  33. Wang G-X, Rashid AM. Job Satisfaction as the Mediator between a Learning Organization and Organizational Commitment among Lecturers. *European Journal of Educational Research*. 2022; 11(2):847–58.
  34. Jameel AS, Ahmad AR. The mediating role of job satisfaction between leadership style and performance of academic staff. *International Journal of Psychosocial Rehabilitation*. 2020; 24(4):2399–414.
  35. Saifi IA, Shahzad K. The Mediating Role of Job Satisfaction in the Relationship between Organizational Justice and Organizational Citizenship Behavior. *Pakistan Journal of Commerce and Social Sciences* [Internet]. 2017; 11(1):126–46. Available from: <https://hdl.handle.net/10419/188285>
  36. Idris, Adi KR, Soetijpto BE, Supriyanto AS. The mediating role of job satisfaction on compensation, work environment, and employee performance: Evidence from Indonesia. *Entrepreneurship and Sustainability Issues*. 2020; 8(2):735–50.
  37. Bhat SA, Darzi MA. Antecedents of tourist loyalty to tourist destinations: a mediated-moderation study. *International Journal of Tourism Cities*. 2018; 4(2):261–78.
  38. Rafique T, Awan MU, Shafiq M, Mahmood K. Exploring the role of ranking systems towards university performance improvement: A focus group-based study. *Heliyon* [Internet]. 2023; 9(10):1–10. Available from: <https://doi.org/10.1016/j.heliyon.2023.e20904> PMID: 37886765
  39. Memon MA, Ting H, Cheah J-H, Thurasamy R, Chuah F, Cham TH. Sample Size for Survey Research: Review and Recommendations. *Journal of Applied Structural Equation Modeling*. 2020; 4(2):i–xx.
  40. Erdfelder E, Faul F, Buchner A. GPOWER: A general power analysis program. *Behavior Research Methods, Instruments, and Computers*. 1996; 28(1):1–11.
  41. Faul F, Erdfelder E, Buchner A, Lang AG. Statistical power analyses using G\*Power 3.1: Tests for correlation and regression analyses. *Behavior Research Methods*. 2009; 41(4):1149–60. <https://doi.org/10.3758/BRM.41.4.1149> PMID: 19897823
  42. Greere A. Training for quality assurance in higher education: practical insights for effective design and successful delivery. *Quality in Higher Education* [Internet]. 2023; 29(2):165–91. Available from: <https://doi.org/10.1080/13538322.2021.2020978>
  43. Chiang CF, Wu KP. The influences of internal service quality and job standardization on job satisfaction with supports as mediators: flight attendants at branch workplace. *International Journal of Human Resource Management*. 2014; 25(19):2644–66.
  44. Churchill GA, Ford NM, Walker OC. Measuring the Job Satisfaction of Industrial Salesmen. *Journal of Marketing Research*. 1974; 11(3):254–60.
  45. Hsieh YM, Hsieh AT. Enhancement of service quality with job standardisation. *Service Industries Journal*. 2001; 21(3):147–66.
  46. Sun H. Total quality management, ISO 9000 certification and performance improvement. *International Journal of Quality and Reliability Management*. 2000; 17(2):168–79.
  47. Sharma DS. The association between ISO 9000 certification and financial performance. *International Journal of Accounting*. 2005; 40(2):151–72.
  48. Terziowski M, Power D, Sohal AS. The longitudinal effects of the ISO 9000 certification process on business performance. *European Journal of Operational Research*. 2003; 146(3):580–95.
  49. Hair JF, Hult GTM, Ringle CM, Sarstedt M, Danks NP, Ray S. Partial Least Squares Structural Equation Modeling (PLS-SEM) Using R [Internet]. Springer Nature Switzerland AG; 2021. Available from: <https://doi.org/10.1007/978-3-030-80519-7>
  50. Kock N. Common method bias in PLS-SEM: A Full Collinearity Assessment Approach. *International Journal of e-Collaboration*. 2015; 11(4):1–10.
  51. Hair JF, Hult GTM, Ringle CM, Sarstedt M. A Primer on Partial Least Squares Structural Equation Modeling (PLS-SEM). Second. Los Angeles: SAGE Publications, Inc; 2017. 374 p.
  52. Henseler J, Ringle CM, Sarstedt M. A new criterion for assessing discriminant validity in variance-based structural equation modeling. *Journal of the Academy of Marketing Science*. 2015; 43(1):115–35.
